# Supplementary material for: Calcitonin gene-related peptide is a key factor in the homing of transplanted human MSCs to sites of spinal cord injury
Source: PubMed Central journal article supplement (PMC4906351; doi:10.1038/srep27724), 2016-06-14
Supplement: srep27724-s1.pdf [file srep27724-s1.pdf]

## **Supplementary Information**

### **Calcitonin gene-related peptide is a key factor in the homing of transplanted human MSCs to sites of spinal cord injury**

Yu Zhang<sup>1,\*</sup>, Jinhua Yang<sup>2,\*</sup>, Peng Zhang<sup>1</sup>, Tao Liu<sup>1</sup>, Jianwei Xu<sup>3</sup>, Zhihai Fan<sup>1</sup>, Yixin Shen<sup>1</sup>, Wenjie Li<sup>4</sup> & Huanxiang Zhang<sup>3</sup>

<sup>1</sup>Department of Orthopedics, the Second Affiliated Hospital of Soochow University, Suzhou, China.

<sup>2</sup>Department of Orthopedics, the Second People's Hospital of Changshu, Suzhou, China.

<sup>3</sup>Department of Cell Biology, Jiangsu Key Laboratory of Stem Cell Research, Medical College of Soochow University, Suzhou Industrial Park, Suzhou, China.

<sup>4</sup>Department of Human Anatomy, Medical College of Soochow University, Suzhou Industrial Park, Suzhou, China.

\*These authors contributed equally to this work.

## **Supplementary Materials and Methods**

### **In vitro differentiation of HUMSCs to neural cells**

To identify the functional role of CGRP on HUMSCs differentiation, HUMSCs were seeded at a density of  $2 \times 10^4$  cells/cm<sup>2</sup> on 0.01% poly-L-lysine (PLL; Sigma)-coated dishes. When cells reached approximately 50% confluence, neural differentiation was performed. Cells in CGRP group were grown in Neurobasal medium (containing 1% N<sub>2</sub>, Gibco) supplemented with  $10^{-7}$  mol/L CGRP (Sigma). And cells in Control group were cultured only in Neurobasal medium with same volume PBS. Approximately 75% of the media was replaced every 3 days. These cells were examined 10 days after differentiation using immunocytochemistry for specific neuro-markers. Map2: a protein found specifically in dendritic branching of neuron; MBP: a protein recognized as the marker of oligodendrocyte or Schwann's cell; Nestin: a protein specifically expressed in neuroepithelial stem cells<sup>1</sup>.

### **Immunocytochemistry**

HUMSCs were fixed in cold 4% paraformaldehyde in 0.1M PBS (pH 7.2) overnight, then washed three times with PBS (5 min) and incubated with primary Abs overnight at 4°C. Primary Abs were diluted in PBS/0.02% NaN<sub>3</sub>/3% bovine serum albumin (BSA)/0.2% Triton X-100 at the following working concentrations: mouse mAb anti-nestin, 1:200 dilution (Chemicon, Temecula, CA); mouse mAb anti-Map2, 1:200 dilution

(Sigma); rabbit mAb anti-MBP, 1:200 dilution (Abcam). After incubation of primary Abs, cells were rinsed with PBS three times prior to secondary antibody application. FITC-conjugated goat anti-mouse Abs (Invitrogen), Cy3-conjugated goat anti-rabbit Abs (Invitrogen) were diluted 1:150 in PBS/0.02% NaN<sub>3</sub>/3% BSA and applied to cells for 1 h at room temperature in the dark. Cells were subsequently washed in PBS three times, and cell nuclei were counterstained with Hoechst 33258 (1:100; Sigma). Fluorescence was examined with Leica DMI 6000 B microscope (Germany). Cells treated with nonspecific mouse IgM, or secondary Abs alone showed no staining.

### Supplementary Figure

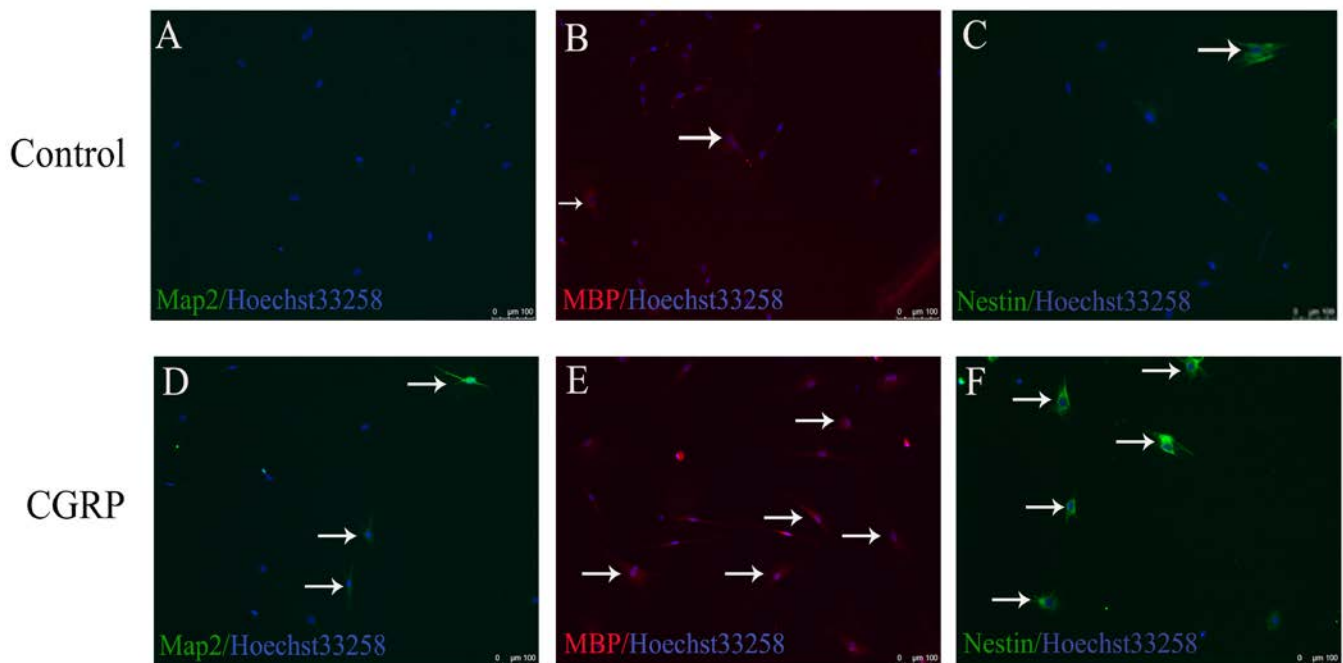

Supplementary Figure S1. Neural markers expression by immunostaining. Immunostaining analysis to detect the expressions of various neural protein markers after CGRP induction for 10 days (D, E and F). Cells in control group were cultured in Neurobasal medium added with same volume PBS (A, B and C). A, D: expression of Map2 (green); B, E: expression of MBP (red); C, F: expression of Nestin (green). Nucleus were stained by Hoechst 33258 (blue). Arrows indicate the typical positive cells. Scale bars = 100  $\mu$ m.

### **Supplementary References**

- 1 Messerli, M. et al. Stem cells from umbilical cord Wharton's jelly from preterm birth have neuroglial differentiation potential. *Reprod Sci* **20**, 1455-1464 (2013).
